# Supplementary material
Source: Springer Nature journal article supplement (https://www.springermedizin.de/resource/supplementary/12950_2009_135_MOESM3_ESM.pdf/9558034)

## Print area

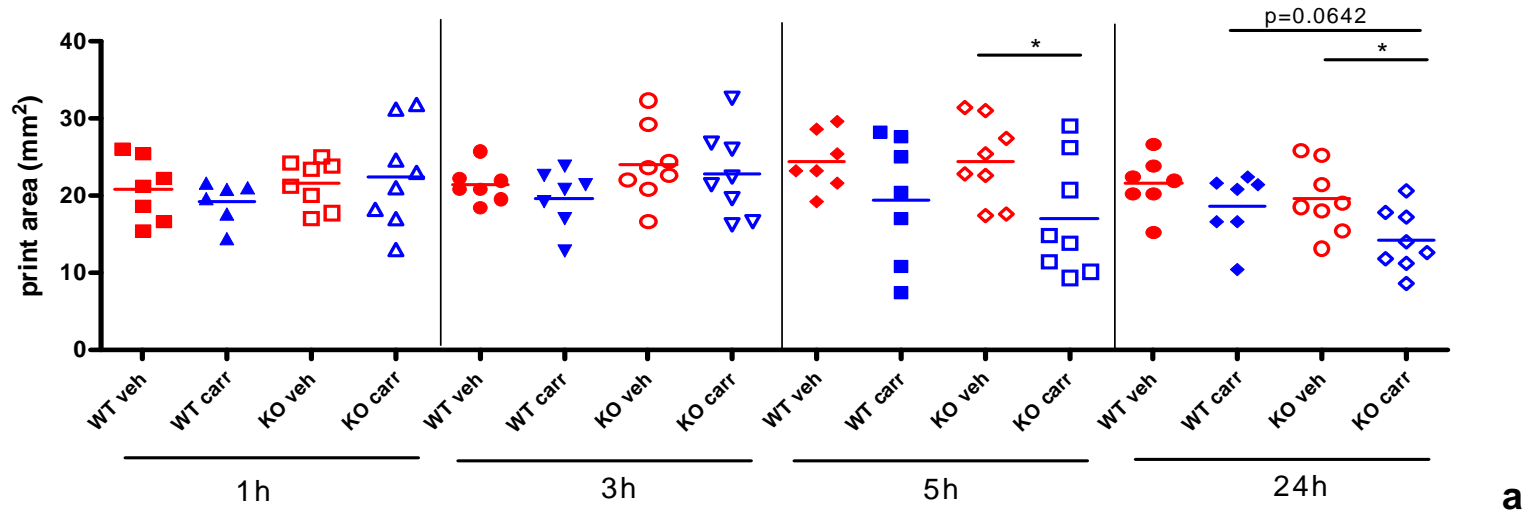

**a**

## Duty cycle

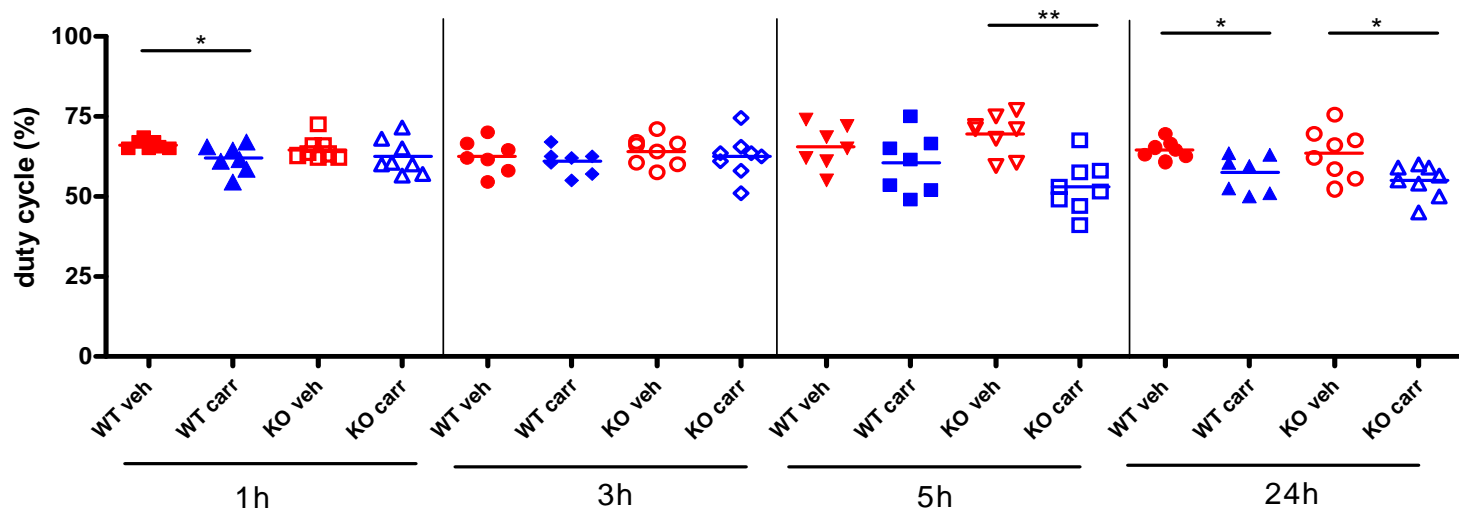

**b**

Supplement: MOESM3 [file 9558034]
